# Supplementary material for: The co-crystal structure of Cbl-b and a small-molecule inhibitor reveals the mechanism of Cbl-b inhibition
Source: PubMed Central journal article supplement (PMC10725504; doi:10.1038/s42003-023-05655-8), 2023-12-16
Supplement: 42003_2023_5655_MOESM1_ESM.pdf [file 42003_2023_5655_MOESM1_ESM.pdf]

1 **SUPPLEMENTARY INFORMATION**

2 **The Co-crystal Structure of Cbl-b and a Small-Molecule Inhibitor Reveals the**  
3 **Mechanism of Cbl-b Inhibition**

4 Serah W. Kimani<sup>1,2</sup>, Sumera Perveen<sup>1</sup>, Magdalena Szewezyk<sup>1</sup>, Hong Zeng<sup>1</sup>, Aiping Dong<sup>1</sup>, Fengling Li<sup>1</sup>,  
5 Pegah Ghiabi<sup>1</sup>, Yanjun Li<sup>1</sup>, Irene Chau<sup>1</sup>, Cheryl H. Arrowsmith<sup>1,2,3</sup>, Dalia Barsyte-Lovejoy<sup>1,4</sup>, Vijayaratnam  
6 Santhakumar<sup>1\*</sup>, Masoud Vedadi<sup>4,5</sup>, Levon Halabelian<sup>1,4\*</sup>

7  
8 <sup>1</sup> Structural Genomics Consortium, University of Toronto, Toronto, Ontario, Canada

9 <sup>2</sup> Princess Margaret Cancer Center, University Health Network, Toronto, Ontario, Canada

10 <sup>3</sup> Department of Medical Biophysics, University of Toronto, Toronto, Ontario, Canada

11 <sup>4</sup> Department of Pharmacology and Toxicology, University of Toronto, Ontario, Canada

12 <sup>5</sup> Drug Discovery Program, Ontario Institute for Cancer Research, Toronto, Ontario, Canada

13 **\*To whom correspondence should be addressed.**

14 **Levon Halabelian**

15 Email: [l.halabelian@utoronto.ca](mailto:l.halabelian@utoronto.ca)

16 Tel: +1 416-946-3876

17  
18 **Vijayaratnam Santhakumar**

19 Email: [santha.santhakumar@utoronto.ca](mailto:santha.santhakumar@utoronto.ca)

20 Tel: +1 416-978-7842

21  
22  
23  
24  
25  
26  
27  
28  
29  
30  
31  
32

33

34

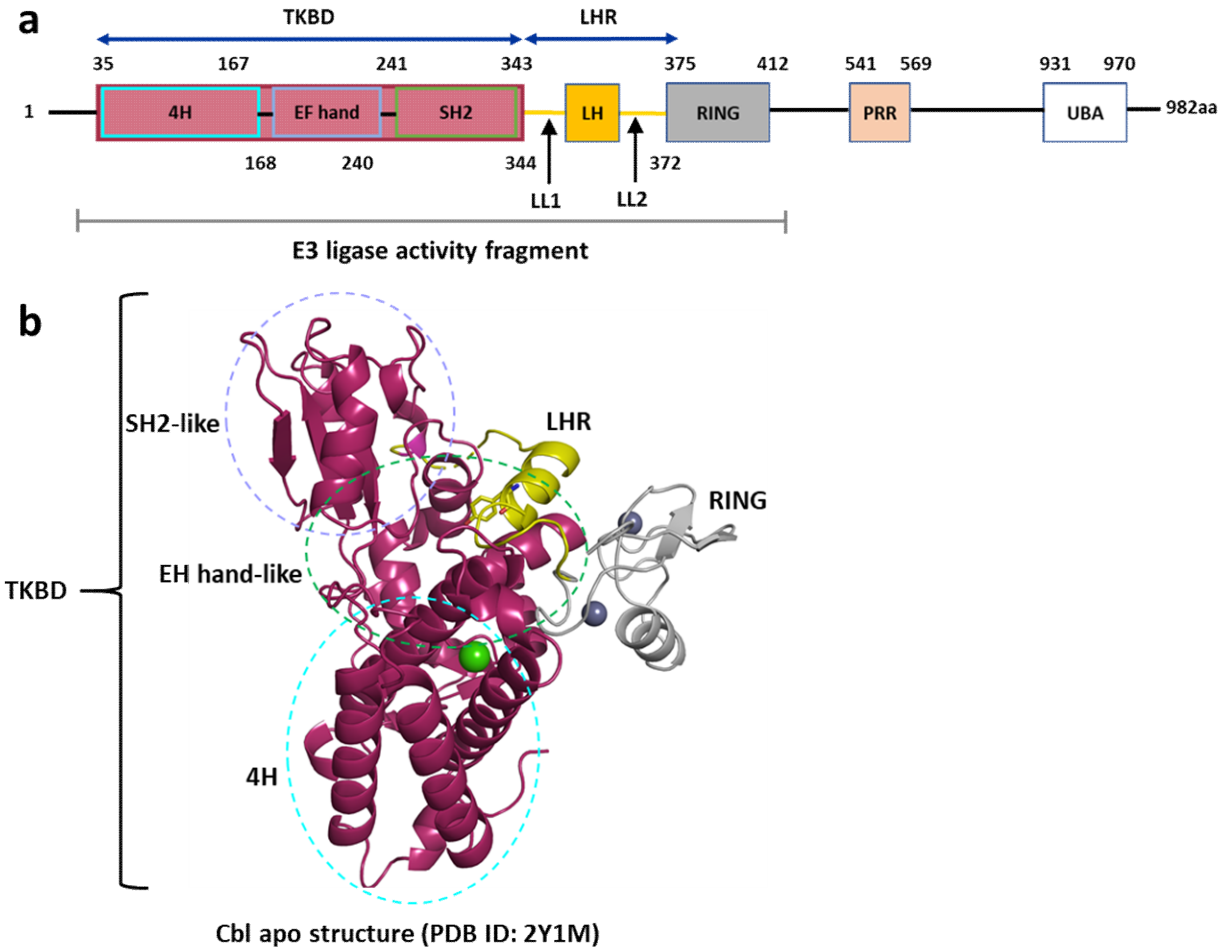

35

36 **Supplementary Figure 1:** Cbl proteins domains. **a** A schematic of the full length Cbl-b protein. The N-  
37 terminal fragment that confers the Cbl-b E3 ligase activity is indicated and contains 3 domains including:  
38 the TKBD colored in magenta (made up of three subdomains, 4H, EF hand and SH2), the LHR shown in  
39 yellow and the RING finger domain in grey. **b** A cartoon representation of the c-Cbl apo protein structure  
40 (PDB ID: 2Y1M) showing the domains of the E3 ligase N-terminal fragment.

41

42

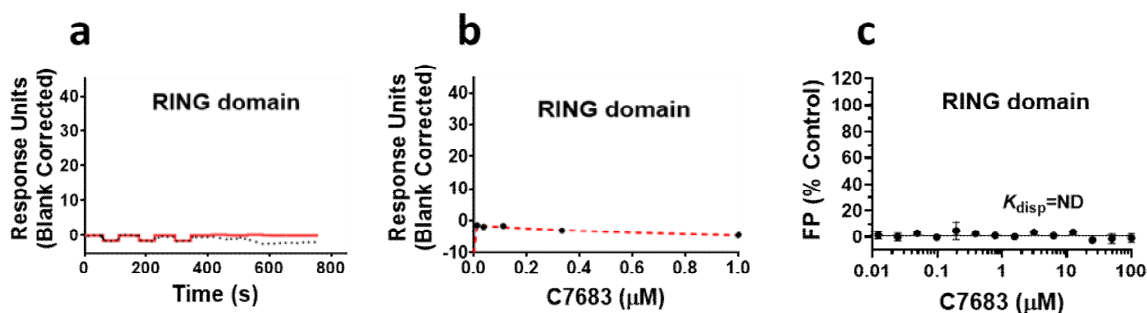

43  
 44 **Supplementary Figure 2. Assessment of C7683 binding to Cbl-b RING domain by SPR and FP probe**  
 45 **displacement.** **a-b** Serially diluted C7683 was flown over immobilized RING domain protein (351-426aa).  
 46 Representative sensorgram is shown in (solid red lines) with the kinetic fit (black dots) in **a**, and the steady-  
 47 state response (black circles) with the steady state 1:1 binding model fitting (red dashed line) in **b**. **c** C7683  
 48 was tested for competing with the fluorescein-labeled probe (C7102) for binding to Cbl-b RING domain.  
 49 C7683 didn't show any binding to the RING domain by SPR and FP. All experiments were performed in  
 50 triplicates (n=3).

51  
 52 **Supplementary Table 1. Summary of binding and peptide displacement assays.** All values are the average  
 53  $\pm$  standard deviation from experiments presented in figures 1 and 2 (n=3). SPR  $K_D$  values are from kinetic  
 54 fitting.

| Target        | Displacement<br>$K_{disp}$ ( $\mu\text{M}$ ) | DSF<br>$\Delta T_m$ ( $^{\circ}\text{C}$ ) | SPR<br>$K_D$ (nM) |
|---------------|----------------------------------------------|--------------------------------------------|-------------------|
| TKBD-LHR-RING | $0.10 \pm 0.02$                              | $10 \pm 0.4$                               | $8 \pm 4$         |
| Full-length   | $0.12 \pm 0.02$                              | $12 \pm 0.2$                               | $12 \pm 6$        |

55  
 56  
 57  
 58  
 59  
 60  
 61  
 62  
 63

64

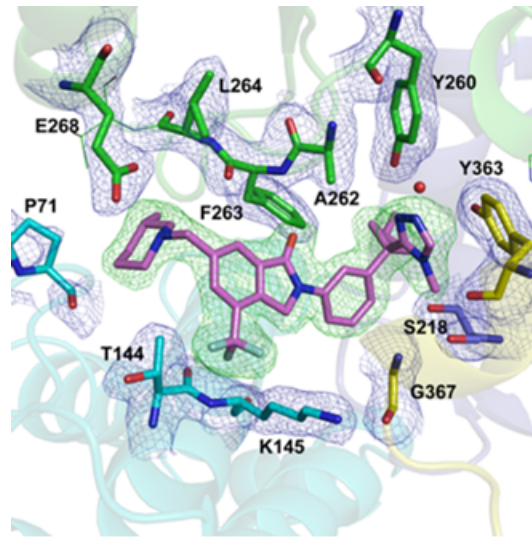

65

66 **Supplementary Figure 3. Electron density map of C7683 bound to the TKBD subdomains and LHR of Cbl-**  
67 **b.** The protein residues in the binding site are shown as sticks and are colored based on their respective  
68 domains as portrayed in figure 5A. A coordinating water molecule is rendered as a red sphere and the  
69 measured 2Fo-Fc electron density map around some of the highlighted residues in the vicinity of the  
70 compound is shown as blue mesh, contoured at 1.0 $\sigma$  level. C7683 electron density omit map (Fo-Fc) is  
71 shown as green mesh contoured at 3 $\sigma$  level and the C7683 compound is rendered as magenta sticks.

72

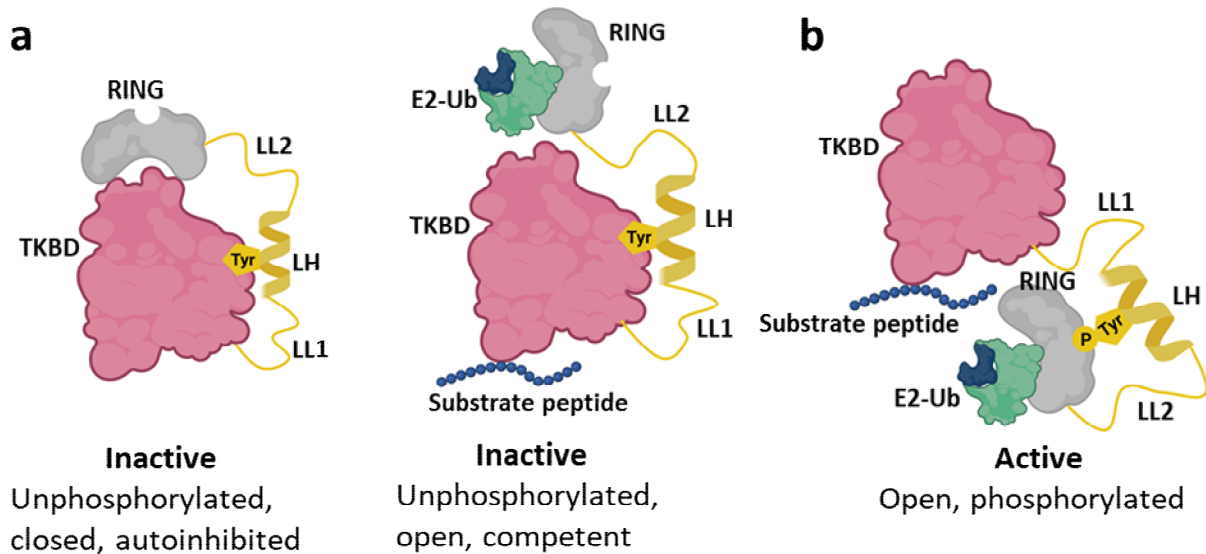

73

74 **Supplementary Figure 4: A model of the LHR-mediated regulation of the Cbl proteins. a** A model of the  
75 unphosphorylated inactive Cbl-b N-terminal fragment of Cbl-b, colored and labeled according to the  
76 schematic in Supplementary Figure 1. The LH is clamped onto the TKBD domain, which restricts the  
77 movement of the RING finger domain to either closed and autoinhibited or open and competent of

78 binding to E2. The conserved tyrosine (Y363 in Cbl-b) is labeled as Tyr. **b** A model of the phosphorylated  
79 active Cbl-b, colored and labeled according to the schematic in panel A. Upon Y363 phosphorylation, the  
80 LH is released from the TKBD, and the RING domain is flipped around 180 degrees and moved adjacent to  
81 the substrate. The phosphorylated tyrosine is labeled (PTyr). Figure created with BioRender.com.

82

83
