# Supplementary material for: The co-crystal structure of Cbl-b and a small-molecule inhibitor reveals the mechanism of Cbl-b inhibition
Source: PubMed Central journal article supplement (PMC10725504; doi:10.1038/s42003-023-05655-8), 2023-12-16
Supplement: 42003_2023_5655_MOESM2_ESM.pdf [file 42003_2023_5655_MOESM2_ESM.pdf]

## Description of Additional Supplementary Files

**File name:** Supplementary Data 1

**Description:** The source data behind the graphs in figures 1, 2 and 3 in the paper and supplementary figure 2 in the supplementary information.
